# Supplementary material for: Platinum(IV) Complexes of the 1,3,5-Triamino Analogue of the Biomolecule Cis-Inositol Designed as Innovative Antineoplastic Drug Candidates
Source: MDPI journal article supplement (doi:10.3390/pharmaceutics14102057), 2022-09-27
Supplement: s1 [file s1]

*Platinum(IV) complexes of the 1,3,5-triamino analogue of the biomolecule cis-inositol designed as innovative antitumor drugs' candidates*

**Vyara Velcheva <sup>1</sup>, Kaspar Hegetschweiler <sup>2</sup>, Georgi Momekov <sup>3,\*</sup>, Stefka Ivanova <sup>3,4</sup>, Angel Ugrinov <sup>4</sup>, Bernd Morgenstern <sup>2</sup> and Galina Gencheva <sup>1,\*</sup>**

<sup>1</sup> Faculty of Chemistry and Pharmacy, Sofia University "St. Kliment Ohridski", 1 J. Bourchier Blvd., 1164 Sofia, Bulgaria; [ahvnyv@chem.uni-sofia.bg](mailto:ahvnyv@chem.uni-sofia.bg) (VV, 0000-0002-1476-7224); (GG, 0000-0003-1696-1589)

<sup>2</sup> Fachrichtung Chemie, Universität des Saarlandes, Campus, D-66123 Saarbrücken, Germany; [hegetschweiler@mx.uni-saarland.de](mailto:hegetschweiler@mx.uni-saarland.de) (KH, 000-0001-9094-9794); [b.morgenstern@mx.uni-saarland.de](mailto:b.morgenstern@mx.uni-saarland.de) (BM, 0000-0002-8360-4218)

<sup>3</sup> Department of Pharmacology, Pharmacotherapy and Toxicology, Faculty of Pharmacy, Medical University of Sofia, 2 Dunav Str., 1000 Sofia, Bulgaria; (GM, 0000-0003-2841-7089)

<sup>4</sup> Department of Pharmaceutical Chemistry and Pharmacognosy, Faculty of Pharmacy, Medical University of Pleven, 1 St. Kliment Ohridski Str., 5800 Pleven, Bulgaria; [ivanovastefka\\_pharm@yahoo.com](mailto:ivanovastefka_pharm@yahoo.com)

<sup>5</sup> Department of Chemistry and Biochemistry, North Dakota State University, 1311 Albrecht Blvd., Fargo, ND 58102, USA; [angel.ugrinov@ndsu.edu](mailto:angel.ugrinov@ndsu.edu) (0000-0002-4284-6923)

\* Correspondence: [gmomekov@pharmfac.mu-sofia.bg](mailto:gmomekov@pharmfac.mu-sofia.bg) (GM); [ggencheva@chem.uni-sofia.bg](mailto:ggencheva@chem.uni-sofia.bg) (GG)

## Electronic supplementary information

### Content

|                                                                                                                                                                                                                                                                                                                                                                                                            |          |
|------------------------------------------------------------------------------------------------------------------------------------------------------------------------------------------------------------------------------------------------------------------------------------------------------------------------------------------------------------------------------------------------------------|----------|
| <b>1. X-Ray analysis data</b>                                                                                                                                                                                                                                                                                                                                                                              | <b>3</b> |
| <b>1.1. Table S1.</b> Selected crystallographic parameters for <b>1A</b> , <b>1B</b> , <b>1C</b> and <b>2A</b> .                                                                                                                                                                                                                                                                                           | <b>3</b> |
| <b>1.2. Table S2.</b> Selected bond lengths [Å] and bond angles [°] for <b>1A</b> , <b>1B</b> , <b>1C</b> and <b>2A</b> with estimated standard deviations in parentheses.                                                                                                                                                                                                                                 | <b>4</b> |
| <b>1.3. Table S3.</b> Bond lengths [Å] and bond angles [°] of hydrogen bonds.                                                                                                                                                                                                                                                                                                                              | <b>5</b> |
| <b>1.4. Figure S1.</b> Packing of the molecules within the unit cell down the a-axis: (a) <b>taciplatin</b> , [PtI <sub>3</sub> (taci)]I·3H <sub>2</sub> O, <b>1A</b> ; (b) [PtI <sub>3</sub> (taci)]I, <b>1B</b> ; (c) [PtI <sub>3</sub> (taci)]I·2DMF, <b>1C</b> ; and down the b-axis (d) <b>ditaciplatin</b> , [Pt(taci) <sub>2</sub> ](CO <sub>3</sub> ) <sub>2</sub> ·6H <sub>2</sub> O, <b>2A</b> . | <b>6</b> |
| <b>1.5. Figure S2.</b> Structure of the complexes <b>1B</b> (a) and <b>1C</b> (b).                                                                                                                                                                                                                                                                                                                         | <b>6</b> |
| <b>1.6. Figure S3.</b> Projection along the plane determined of O1S, Pt, C8, O3S in <b>2A</b> .                                                                                                                                                                                                                                                                                                            | <b>7</b> |
| <b>2. FTIR spectra</b>                                                                                                                                                                                                                                                                                                                                                                                     | <b>7</b> |
| <b>2.1. Table S4.</b> Selected IR spectral data.                                                                                                                                                                                                                                                                                                                                                           | <b>7</b> |
| <b>3. Solid State NMR spectra</b>                                                                                                                                                                                                                                                                                                                                                                          | <b>8</b> |
| <b>3.1. Figure S4.</b> <sup>15</sup> N CP-MAS NMR spectrum of <b>1A</b> .                                                                                                                                                                                                                                                                                                                                  | <b>9</b> |
| <b>3.2. Figure S5.</b> <sup>15</sup> N CP-MAS NMR spectrum of <b>2A</b> .                                                                                                                                                                                                                                                                                                                                  | <b>9</b> |

|                                                                                                                                            |           |
|--------------------------------------------------------------------------------------------------------------------------------------------|-----------|
| <b>3.3. Figure S6.</b> $^{13}\text{C}$ CP-MAS NMR spectrum of <b>1A</b> .                                                                  | <b>10</b> |
| <b>3.4. Figure S7.</b> $^{13}\text{C}$ CP-MAS NMR spectrum of <b>2A</b> .                                                                  | <b>10</b> |
| <b>4. NMR Spectra (in solution)</b>                                                                                                        | <b>11</b> |
| <b>4.1. Figure S8.</b> $^{13}\text{C}$ -NMR spectrum of $\text{taci}\cdot 2\text{H}_2\text{O}$ in $\text{D}_2\text{O}$ , $\text{pD}=8.4$ . | <b>11</b> |
| <b>4.2. Figure S9.</b> $^{13}\text{C}$ -NMR spectrum of <b>1</b> (a) and <b>2</b> (b) in $\text{D}_2\text{O}$ .                            | <b>11</b> |

## 1. X-Ray analysis data

**Table S1.** Selected crystallographic parameters for **1A**, **1B**, **1C** and **2A**.

| Identification code                     | <b>1A</b>                                                                                           | <b>1B</b>                                                                     | <b>1C</b>                                                                                                            | <b>2A</b>                                                                                               |
|-----------------------------------------|-----------------------------------------------------------------------------------------------------|-------------------------------------------------------------------------------|----------------------------------------------------------------------------------------------------------------------|---------------------------------------------------------------------------------------------------------|
| Empirical formula                       | C <sub>6</sub> H <sub>15</sub> N <sub>6</sub> O <sub>3</sub> PtI <sub>4</sub> · 1.9H <sub>2</sub> O | C <sub>6</sub> H <sub>15</sub> N <sub>3</sub> O <sub>3</sub> PtI <sub>4</sub> | C <sub>6</sub> H <sub>15</sub> N <sub>3</sub> O <sub>3</sub> Pt I <sub>4</sub> · 2(C <sub>6</sub> H <sub>7</sub> NO) | C <sub>12</sub> H <sub>30</sub> N <sub>6</sub> O <sub>6</sub> Pt · 2CO <sub>3</sub> · 6H <sub>2</sub> O |
| Formula weight                          | 914.42                                                                                              | 879.90                                                                        | 1026.09                                                                                                              | 776.62                                                                                                  |
| Crystal system                          | monoclinic                                                                                          | triclinic                                                                     | monoclinic                                                                                                           | monoclinic                                                                                              |
| Space group, <b>Z</b>                   | P2 <sub>1</sub> /c, <b>8</b> (no. 14)                                                               | P-1, <b>2</b> (no. 2)                                                         | P2 <sub>1</sub> /n, <b>4</b> (no. 14)                                                                                | C2/c, <b>4</b> (no. 15)                                                                                 |
| a[Å]                                    | 14.7525(17)                                                                                         | 8.310(2)                                                                      | 8.5050(13)                                                                                                           | 18.2792(16)                                                                                             |
| b[Å]                                    | 14.7601(18)                                                                                         | 9.679(3)                                                                      | 14.441(3)                                                                                                            | 9.4678(8)                                                                                               |
| c[Å]                                    | 18.3408(19)                                                                                         | 10.064(3)                                                                     | 20.993(4)                                                                                                            | 14.6798(12)                                                                                             |
| α[°]                                    | 90                                                                                                  | 94.437(9)                                                                     | 90                                                                                                                   | 90                                                                                                      |
| β[°]                                    | 108.102(4)                                                                                          | 91.623(8)                                                                     | 93.956(6)                                                                                                            | 103.176(2)                                                                                              |
| γ[°]                                    | 90                                                                                                  | 96.250(9)                                                                     | 90                                                                                                                   | 90                                                                                                      |
| Volume[Å <sup>3</sup> ]                 | 3796.0(8)                                                                                           | 801.7(4)                                                                      | 2572.2(8)                                                                                                            | 2473.7(4)                                                                                               |
| ρ <sub>calc</sub> [g/cm <sup>3</sup> ]  | 3.200                                                                                               | 3.645                                                                         | 2.650                                                                                                                | 2.088                                                                                                   |
| μ [mm <sup>-1</sup> ]                   | 13.913                                                                                              | 16.454                                                                        | 10.285                                                                                                               | 5.771                                                                                                   |
| T <sub>min</sub> , T <sub>max</sub>     | 0.0648, 0.1495                                                                                      | 0.0299, 0.0911                                                                | 0.0037, 0.0183                                                                                                       | 0.2787, 0.7456                                                                                          |
| F(000)                                  | 3241                                                                                                | 772.0                                                                         | 1864.0                                                                                                               | 1560.0                                                                                                  |
| Radiation                               | MoKα (λ = 0.71073)                                                                                  | MoKα (λ = 0.71073)                                                            | MoKα (λ = 0.71073)                                                                                                   | MoKα (λ = 0.71073)                                                                                      |
| 2θ range for data collection[°]         | 4.158 to 52.822                                                                                     | 4.062 to 50.164                                                               | 3.426 to 50.032                                                                                                      | 4.874 to 55.044                                                                                         |
| Total Reflections, R <sub>int</sub> [%] | 40445, 8.2                                                                                          | 7477, 6.66                                                                    | 15905, 9.57                                                                                                          | 13768, 6.52                                                                                             |
| Indep. Refl., Refl.[I>=2σ]              | 7736, 6397                                                                                          | 2793, 2352                                                                    | 4467, 3136                                                                                                           | 2840, 2109                                                                                              |
| Goodness-of-fit on F <sup>2</sup>       | 1.043                                                                                               | 1.041                                                                         | 1.001                                                                                                                | 0.957                                                                                                   |
| R1 and wR2 [I>=2σ] [%]                  | 3.64, 7.69                                                                                          | 4.07, 10.17                                                                   | 5.35, 13.49                                                                                                          | 2.41, 6.03                                                                                              |
| R1 and wR2 [%]                          | 4.85, 8.07                                                                                          | 5.12, 10.63                                                                   | 7.87, 15.11                                                                                                          | 3.37, 6.81                                                                                              |

$$| - |Fc| | / \sum |Fo|, wR_2 = [\sum w[(Fo)^2 - (Fc)^2]^2 / \sum w(Fo^2)^2]^{1/2} \text{ for } Fo^2 > 2\sigma(Fo^2), w = [\sigma^2(Fo)^2 + (AP)^2 + BP]^{-1} \text{ where } P = [(Fo)^2 + 2(Fc)^2] / 3$$

**Table S2.** Selected bond lengths [Å] and bond angles [°] for **1A**, **1B**, **1C** and **2A** with estimated standard deviations in parentheses.

| Compound                 | 1A-A       | 1A-B       | 1B         | 1C         | Compound                | 2A        |
|--------------------------|------------|------------|------------|------------|-------------------------|-----------|
| <b>Bond distance [Å]</b> |            |            |            |            | <b>Bond lengths [Å]</b> |           |
| Pt1-I1                   | 2.6367(6)  | 2.6373(7)  | 2.6461(10) | 2.6181(12) | Pt1-N1A                 | 2.0684(3) |
| Pt1-I2                   | 2.6376(6)  | 2.6380(7)  | 2.6448(10) | 2.6395(12) | Pt1-N2A                 | 2.0767(2) |
| Pt1 -I3                  | 2.6458(7)  | 2.6423(7)  | 2.6397(11) | 2.6413(11) | Pt1-N3A                 | 2.0702(3) |
| Pt1-N1                   | 2.108(6)   | 2.118(6)   | 2.104(9)   | 2.0910(11) | Pt1-N1B                 | 2.0684(3) |
| Pt1-N2                   | 2.106(6)   | 2.127(6)   | 2.100(10)  | 2.1020(10) | Pt1-N2B                 | 2.0767(2) |
| Pt1-N3                   | 2.090(6)   | 2.092(6)   | 2.110(9)   | 2.1220(11) | Pt1-N3B                 | 2.0702(3) |
| <b>Bond angles [°]</b>   |            |            |            |            | <b>Bond angles [°]</b>  |           |
| I1-Pt1-I3                | 91.51(2)   | 91.53(2)   | 89.20(3)   | 90.40(4)   | N3B-Pt1-N2B             | 88.80(14) |
| I1-Pt1-I2                | 90.25(2)   | 90.86(2)   | 95.40(4)   | 92.27(4)   | N3B-Pt1-N1B             | 91.51(11) |
| I2-Pt1-I3                | 90.88(2)   | 91.54(2)   | 89.05(3)   | 90.73(4)   | N3B-Pt1-N1A             | 88.49(11) |
| N1-Pt1-I1                | 178.13(18) | 178.80(17) | 176.2(2)   | 177.6(3)   | N3B-Pt1-N2A             | 91.20(14) |
| N1 -Pt1-I3               | 88.92(18)  | 89.64(18)  | 90.8(3)    | 91.9(3)    | N1B-Pt1-N2B             | 89.91(11) |
| N1-Pt1-I2                | 91.57(18)  | 89.39(17)  | 88.4(2)    | 88.2(3)    | N1A-Pt1-N1B             | 180.0     |
| N1-Pt1-N3                | 90.1(3)    | 89.8(2)    | 90.2(4)    | 87.6(4)    | N2A-Pt1-N2B             | 180.0     |
| N2-Pt1-I1                | 89.12(17)  | 90.32(17)  | 86.9(3)    | 87.9(3)    | N2A-Pt1-N1B             | 90.09(11) |
| N2-Pt1-I3                | 89.17(17)  | 89.13(18)  | 91.9(3)    | 89.0(3)    | N2A-Pt1-N1A             | 89.91(11) |
| N2-Pt1-I2                | 179.37(17) | 178.64(17) | 177.5(3)   | 179.7(3)   | N3A-Pt1-N2B             | 91.20(14) |
| N2-Pt1-N1                | 89.1(2)    | 89.4(2)    | 89.3(4)    | 91.6(4)    | N3A-Pt1-N3B             | 180.0     |
| N3-Pt1-N2                | 89.6(2)    | 89.6(2)    | 89.8(4)    | 89.5(4)    | N3A-Pt1-N1B             | 88.49(11) |
| N3-Pt1-I1                | 89.47(17)  | 89.02(17)  | 89.9(3)    | 90.1(3)    | N3A-Pt1-N1A             | 91.51(11) |
| N3-Pt1-I3                | 178.44(18) | 178.60(17) | 178.1(2)   | 178.4(3)   | N3A-Pt1-N2A             | 88.80(14) |
| N3-Pt1-I2                | 90.33(17)  | 89.74(17)  | 89.4(3)    | 90.8(3)    | N1A-Pt1-N2B             | 90.09(11) |

**Table S3.** Bond lengths [Å] and bond angles [°] of hydrogen bonds.

| D                                                                                                                                                                                                                                                      | H    | A                | d(D-H)/Å | d(H-A)/Å | d(D-A)/Å  | D-H-A/° |
|--------------------------------------------------------------------------------------------------------------------------------------------------------------------------------------------------------------------------------------------------------|------|------------------|----------|----------|-----------|---------|
| <b>1A</b>                                                                                                                                                                                                                                              |      |                  |          |          |           |         |
| O2A                                                                                                                                                                                                                                                    | H2A  | O2S              | 0.82     | 1.98     | 2.762(9)  | 159.2   |
| O2A                                                                                                                                                                                                                                                    | H2A  | O5S              | 0.82     | 2.78     | 3.30(2)   | 122.6   |
| N2A                                                                                                                                                                                                                                                    | H2AA | O5S <sup>1</sup> | 0.89     | 2.06     | 2.875(19) | 151.5   |
| N2A                                                                                                                                                                                                                                                    | H2AB | O2A <sup>1</sup> | 0.89     | 2.32     | 3.091(8)  | 145.2   |
| N1B                                                                                                                                                                                                                                                    | H1BA | O3B <sup>2</sup> | 0.89     | 2.32     | 3.097(8)  | 145.3   |
| N1B                                                                                                                                                                                                                                                    | H1BB | O4S <sup>2</sup> | 0.89     | 2.03     | 2.856(16) | 152.9   |
| O3A                                                                                                                                                                                                                                                    | H3A  | O1S              | 0.87     | 2.57     | 3.142(11) | 124.6   |
| N1A                                                                                                                                                                                                                                                    | H1AA | O2S <sup>3</sup> | 0.89     | 2.31     | 3.166(10) | 161.2   |
| N3A                                                                                                                                                                                                                                                    | H3AB | O1S              | 0.89     | 2.27     | 3.114(10) | 157.9   |
| O1S                                                                                                                                                                                                                                                    | H1SA | O3S              | 0.85     | 1.99     | 2.838(11) | 173.4   |
| O1S                                                                                                                                                                                                                                                    | H1SB | O4S              | 0.85     | 2.12     | 2.82(2)   | 139.2   |
| O2S                                                                                                                                                                                                                                                    | H2SA | O5S              | 0.95     | 2.04     | 2.84(2)   | 139.7   |
| O2S                                                                                                                                                                                                                                                    | H2SB | O3S <sup>4</sup> | 0.95     | 1.98     | 2.856(12) | 152.5   |
| O4S                                                                                                                                                                                                                                                    | H4SA | O1A <sup>4</sup> | 0.85     | 2.39     | 2.936(18) | 122.5   |
| O4S                                                                                                                                                                                                                                                    | H4SB | O3B              | 0.85     | 2.75     | 3.278(17) | 121.9   |
| O5S                                                                                                                                                                                                                                                    | H5SB | O1B <sup>5</sup> | 0.85     | 2.25     | 2.91(2)   | 133.5   |
| Symmetry codes:<br><sup>1</sup> 2-X,1-Y,-Z; <sup>2</sup> 3-X,1-Y,1-Z; <sup>3</sup> 2-X,1/2+Y,1/2-Z; <sup>4</sup> 2-X,-1/2+Y,1/2-Z; <sup>5</sup> 3-X,-1/2+Y,1/2-Z                                                                                       |      |                  |          |          |           |         |
| <b>1C</b>                                                                                                                                                                                                                                              |      |                  |          |          |           |         |
| O2                                                                                                                                                                                                                                                     | H2   | O2S              | 0.84     | 1.85     | 2.627(15) | 154.2   |
| O3                                                                                                                                                                                                                                                     | H3   | O1S              | 0.84     | 1.93     | 2.695(15) | 151.6   |
| N1                                                                                                                                                                                                                                                     | H1B  | O2S <sup>1</sup> | 0.91     | 2.22     | 2.885(16) | 129.4   |
| Symmetry Code:<br><sup>1</sup> 1/2-X,1/2+Y,1/2-Z                                                                                                                                                                                                       |      |                  |          |          |           |         |
| <b>2A</b>                                                                                                                                                                                                                                              |      |                  |          |          |           |         |
| O1S                                                                                                                                                                                                                                                    | H1SA | O6 <sup>1</sup>  | 0.85     | 1.94     | 2.760(4)  | 162.3   |
| O2                                                                                                                                                                                                                                                     | H2   | O8 <sup>2</sup>  | 0.82     | 2.02     | 2.696(7)  | 139.6   |
| O2                                                                                                                                                                                                                                                     | H2   | O10 <sup>3</sup> | 0.82     | 1.70     | 2.511(6)  | 167.3   |
| N2                                                                                                                                                                                                                                                     | H2B  | O9 <sup>4</sup>  | 0.89     | 1.96     | 2.830(7)  | 166.3   |
| N2                                                                                                                                                                                                                                                     | H2B  | O10 <sup>5</sup> | 0.89     | 1.79     | 2.566(6)  | 144.9   |
| O2S                                                                                                                                                                                                                                                    | H2SA | O8 <sup>6</sup>  | 0.71     | 2.11     | 2.752(7)  | 152.0   |
| O2S                                                                                                                                                                                                                                                    | H2SA | O9               | 0.71     | 2.17     | 2.869(7)  | 171.8   |
| O3S                                                                                                                                                                                                                                                    | H3SB | O4 <sup>7</sup>  | 0.85     | 1.84     | 2.665(6)  | 163.3   |
| O1                                                                                                                                                                                                                                                     | H1   | O4 <sup>4</sup>  | 0.82     | 1.95     | 2.634(9)  | 140.4   |
| O1                                                                                                                                                                                                                                                     | H1   | O4 <sup>8</sup>  | 0.82     | 1.89     | 2.638(8)  | 151.2   |
| O3                                                                                                                                                                                                                                                     | H3   | O6               | 0.82     | 1.80     | 2.621(4)  | 174.9   |
| N1                                                                                                                                                                                                                                                     | H1B  | O1S              | 0.89     | 1.97     | 2.841(4)  | 164.9   |
| N3                                                                                                                                                                                                                                                     | H3A  | O8               | 0.89     | 2.04     | 2.854(8)  | 152.0   |
| N3                                                                                                                                                                                                                                                     | H3A  | O9 <sup>6</sup>  | 0.89     | 1.89     | 2.728(6)  | 156.6   |
| Symmetry codes:<br><sup>1</sup> -X,2-Y,2-Z; <sup>2</sup> 1/2-X,-1/2+Y,3/2-Z; <sup>3</sup> +X,2-Y,-1/2+Z; <sup>4</sup> +X,-1+Y,+Z; <sup>5</sup> 1/2-X,3/2-Y,2-Z; <sup>6</sup> 1/2-X,5/2-Y,2-Z; <sup>7</sup> 1/2+X,-1/2+Y,+Z; <sup>8</sup> -X,-1+Y,3/2-Z |      |                  |          |          |           |         |

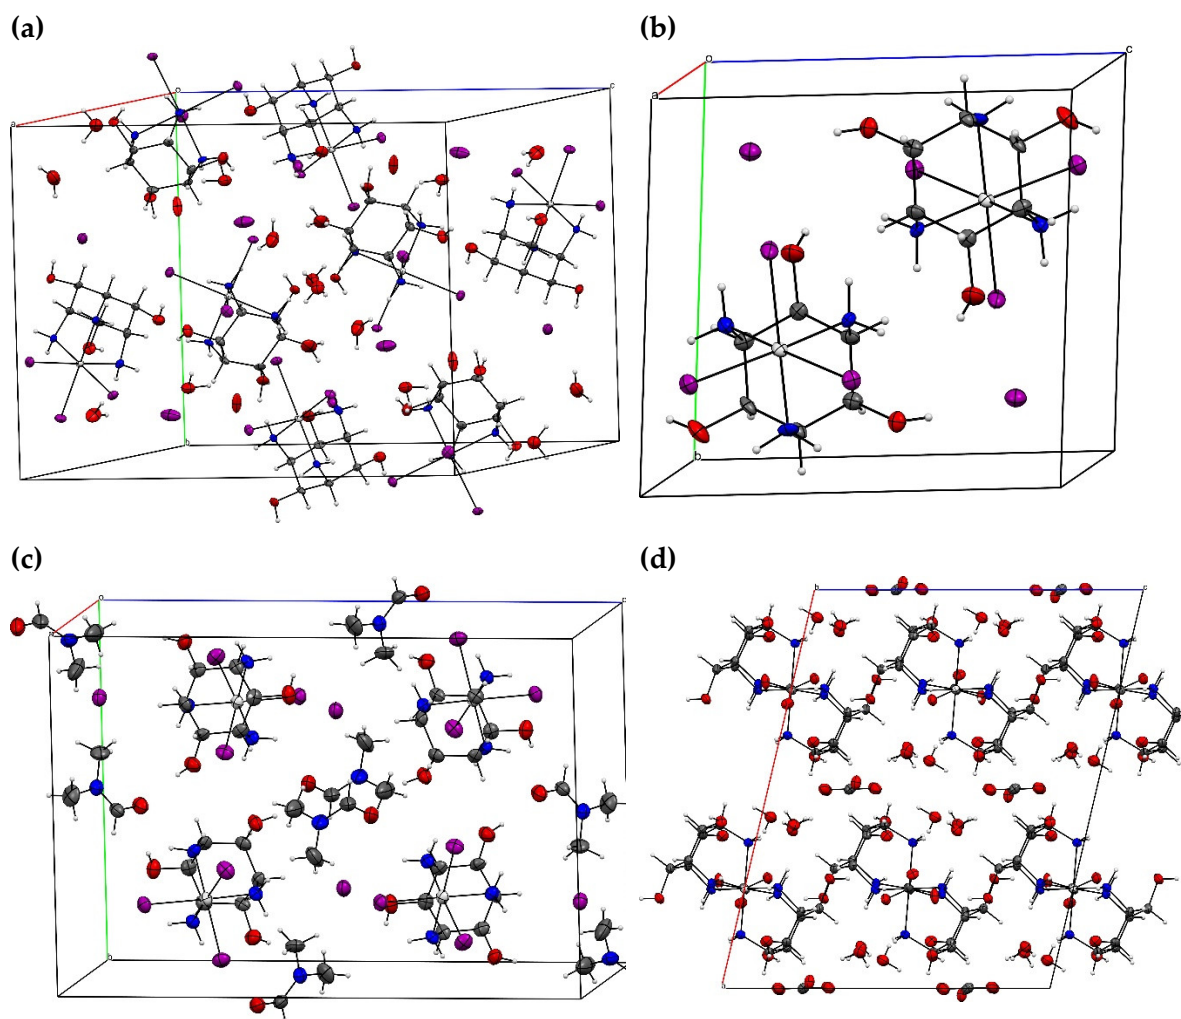

**Figure S1.** Packing of the molecules within the unit cell down the a-axis: (a) **taci**platin,  $[\text{PtI}_3(\text{taci})]\text{I} \cdot 3\text{H}_2\text{O}$ , **1A**; (b)  $[\text{PtI}_3(\text{taci})]\text{I}$ , **1B**; (c)  $[\text{PtI}_3(\text{taci})]\text{I} \cdot 2\text{DMF}$ , **1C**; and down the b-axis (d) **di**taci $\text{platin}$ ,  $[\text{Pt}(\text{taci})_2](\text{CO}_3)_2 \cdot 6\text{H}_2\text{O}$ , **2A**.

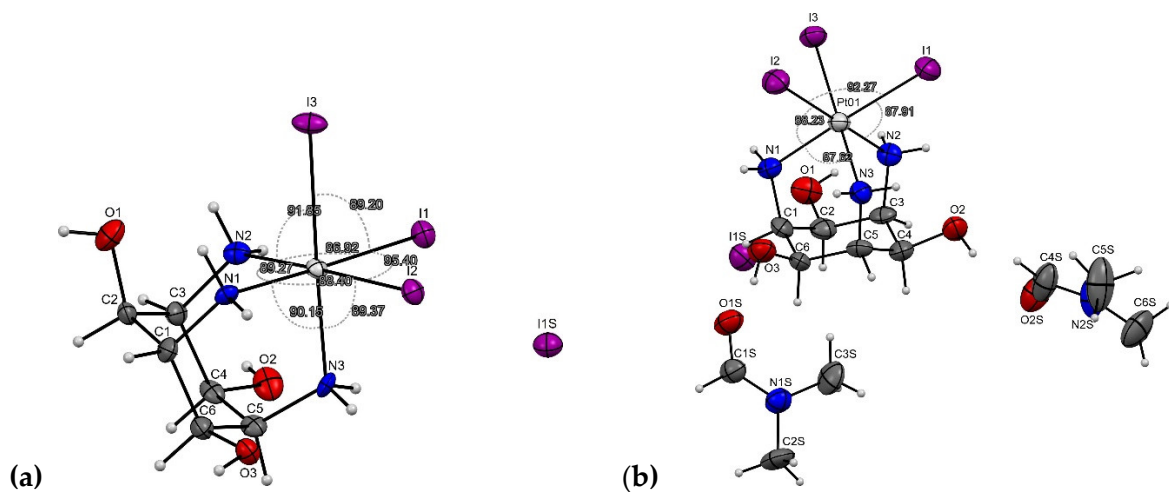

**Figure S2.** Structure of the complexes **1B** (a) and **1C** (b).

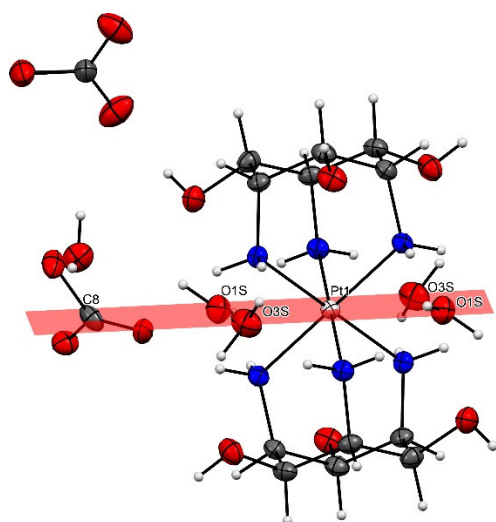

**Figure S3.** Projection along the plane determined of O1S, Pt, C8, O3S in the structure of **2A**.

## 2. FTIR spectra

**Table S4.** Selected IR spectral data.

| Assignments/ [cm <sup>-1</sup> ]           | taci.2H <sub>2</sub> O       | 1A                           | 2A                   |
|--------------------------------------------|------------------------------|------------------------------|----------------------|
| $\nu^{as,s}$ (H <sub>2</sub> O) overlapped | ~3550 sh<br>~3410 sh         | ~3580 w. br<br>~3530         | ~3510 sh.            |
| $\delta$ (H <sub>2</sub> O)                | 1638<br>1620 sh              | 1620                         | ~1640 sh.            |
| $\nu$ (OH)                                 | 3497 str<br>3268<br>3180 br  | 3567<br>3483<br>3358         | 3425<br>3357<br>3324 |
| $\delta$ (H-C-O-H) in plane                | 1460 sh<br>1437<br>1376      | 1430 w<br>1412 w<br>1369 str | 1473<br>1394<br>1372 |
| $\nu$ (O-C-C-N)                            | 1109<br>1071<br>1050         | 1102<br>1079<br>1053<br>1046 | 1095 sh.<br>1073 str |
| $\delta$ (C-O-H) <sub>out of plane</sub>   | 676<br>649 w<br>626<br>603 w | 577                          | 599                  |

|                                                |       |          |           |
|------------------------------------------------|-------|----------|-----------|
| $\nu^{\text{as, s}}(\text{NH}_2)$              | 3332  | 3248     | 3262      |
|                                                | 3259  | 3225     | 3221      |
|                                                |       | 3192 sh  | 3123      |
|                                                |       | 3171 str | 3073      |
| $\delta(\text{NH}_2)$                          | 1595  | 1594     | 1606      |
|                                                | 1565  | 1583     | 1572 str  |
| $\delta(\text{NH}_2)\text{-H-bonded}$          | 1523  | 1549     | 1555 sh   |
|                                                |       | 1530     |           |
| $\delta(\text{H-C-(NH}_2)_t)$                  | 1281  | 1247     | 1240      |
|                                                | 1257  | 1226     | 1172      |
|                                                | 1228  | 1208     | 1130      |
|                                                | 1199  | 1179     |           |
|                                                | 1169  | 1163     |           |
|                                                | 1148  | 1151     |           |
| $\nu(\text{C-N})$                              | 1026  | 1072     | 1000      |
|                                                | 1005  | 1052     | 976       |
|                                                | 960   | 1046     | 982       |
| $\delta(\text{NH}_2)_w \text{ (out of plane)}$ | 911   | 938      | 966       |
|                                                | 875   | 867      | 887       |
|                                                | 822   | 799      | 821       |
| $\nu(\text{Pt-N})$                             | ----- | 518      | 539, str. |
|                                                |       | 481      |           |
|                                                |       | 435      |           |
| $\nu(\text{Pt-I})$                             | ----- | 307      | -----     |
|                                                |       | 275      |           |
|                                                |       | 250      |           |
| $\nu(\text{CO}_3)$                             |       | -----    | 1451      |
|                                                |       |          | 1410      |
|                                                |       |          | 1162      |
|                                                |       |          | 1131      |
|                                                |       |          | 905       |
|                                                |       |          | 871       |
|                                                |       |          | 688       |
|                                                |       |          | 618       |

**br = broad; sh = shoulder; str = strong; w = weak**



### 3. Solid-state NMR spectra

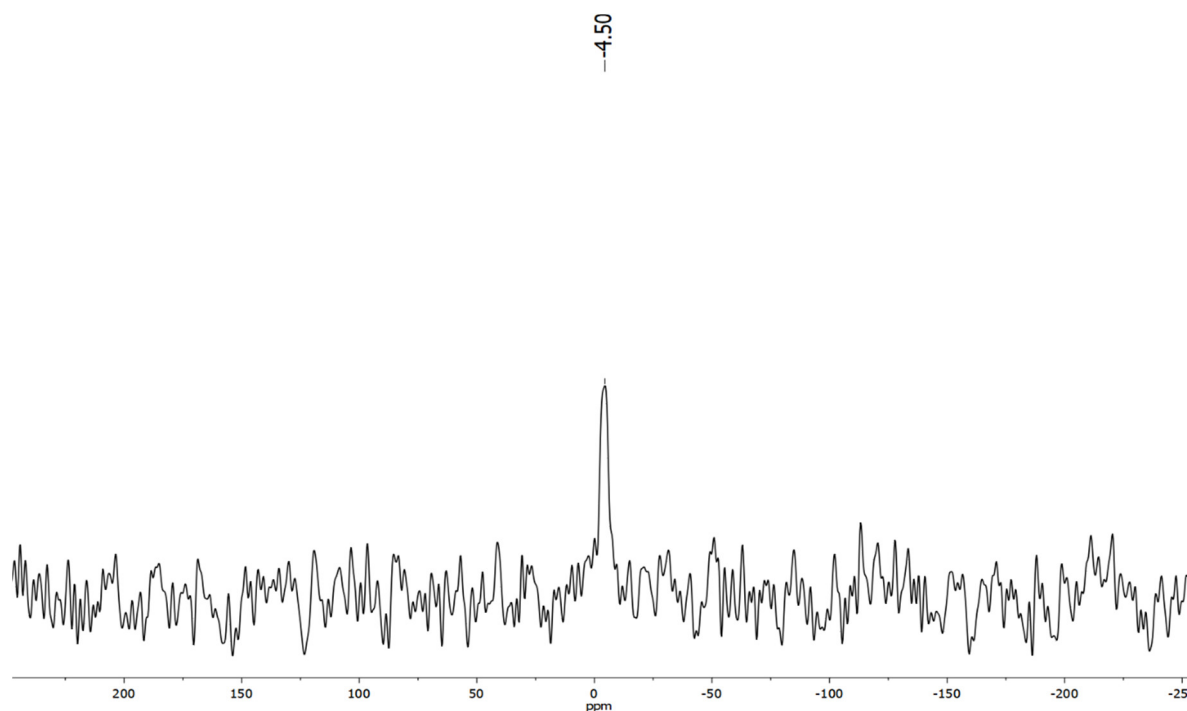

**Figure S4.**  $^{15}\text{N}$  CP-MAS NMR spectrum of **1A**

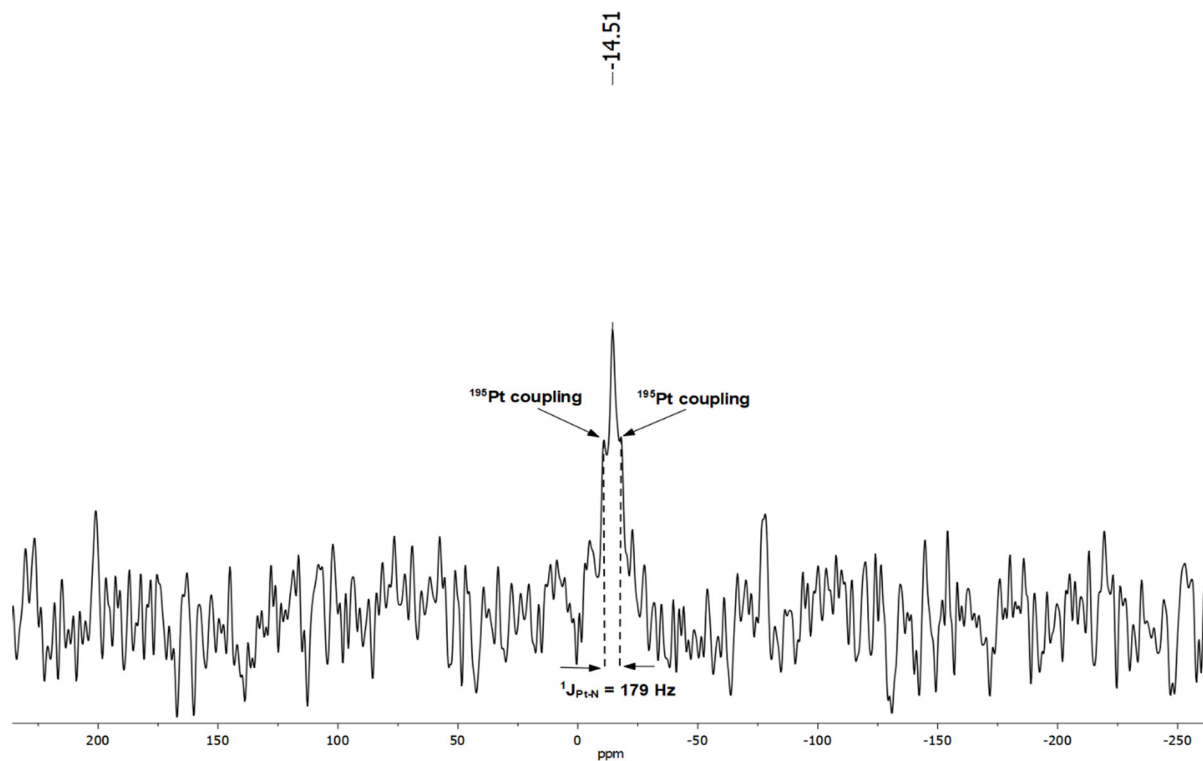

**Figure S5.**  $^{15}\text{N}$  CP-MAS NMR spectrum of **2A**.

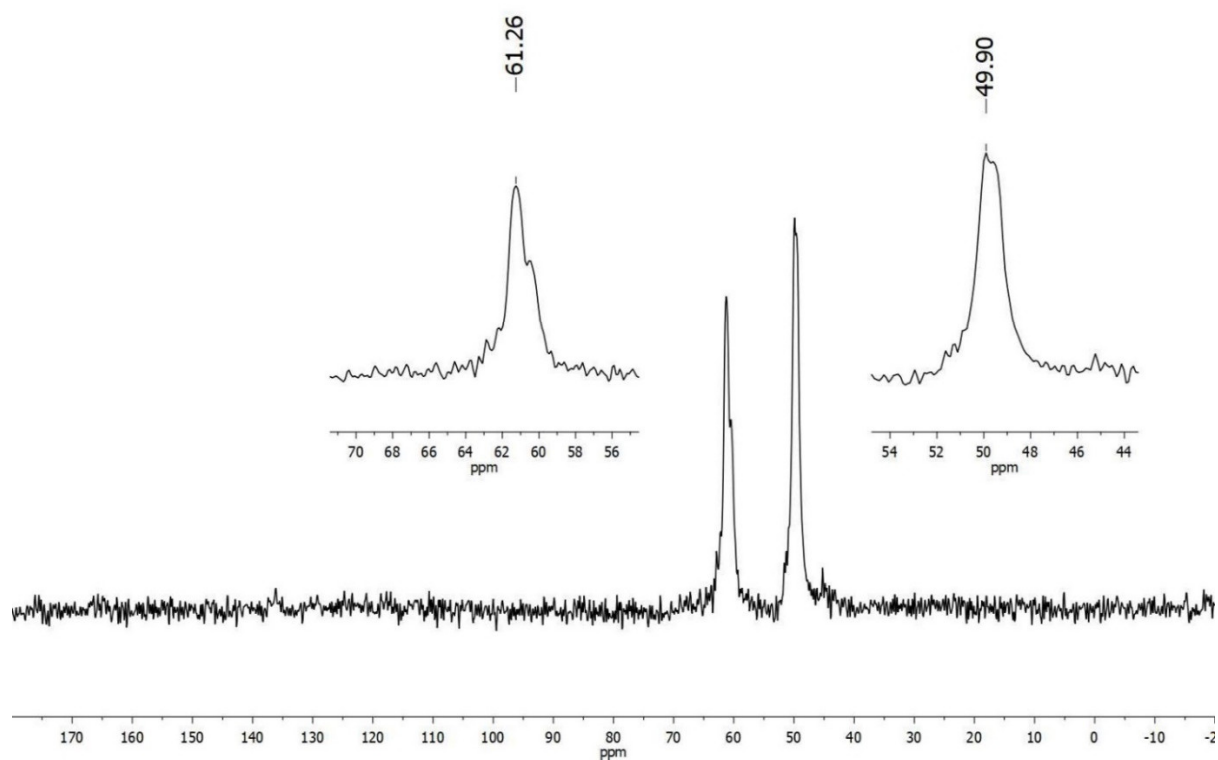

**Figure S6.**  $^{13}\text{C}$  CP-MAS NMR spectrum of 1A.

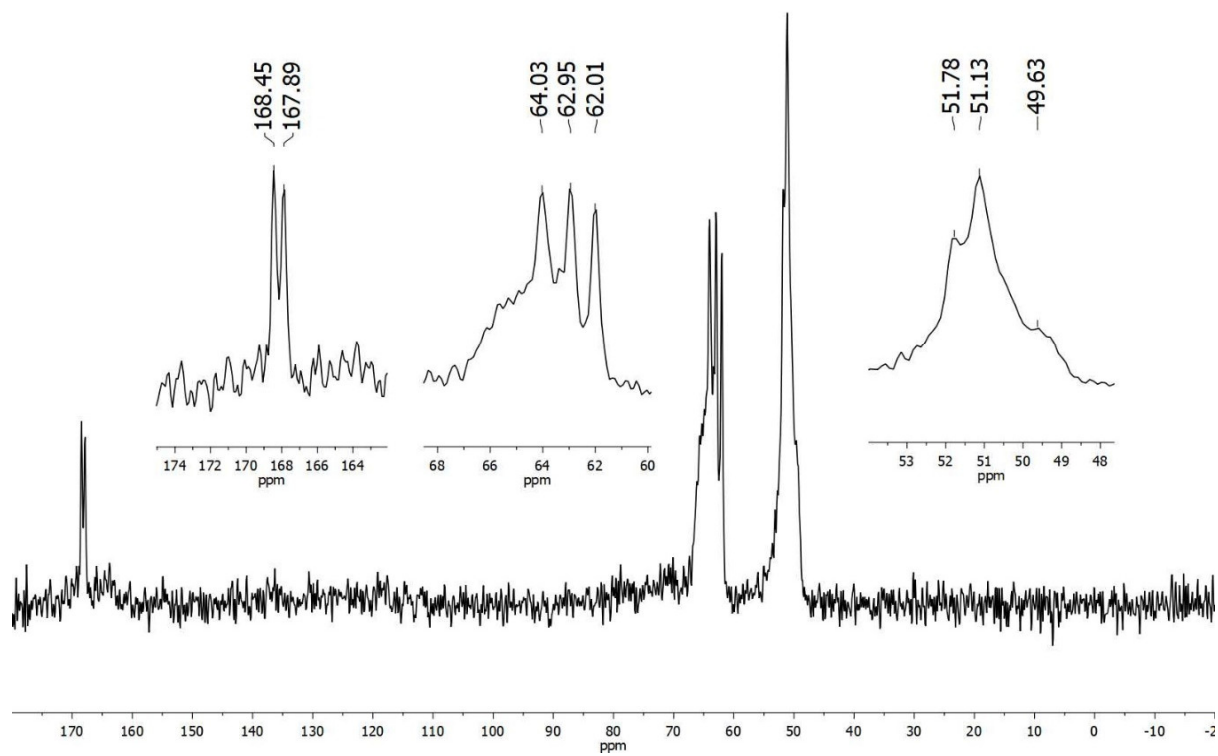

**Figure S7.**  $^{13}\text{C}$  CP-MAS NMR spectrum of 2A.

#### 4. NMR Spectra (in solution).

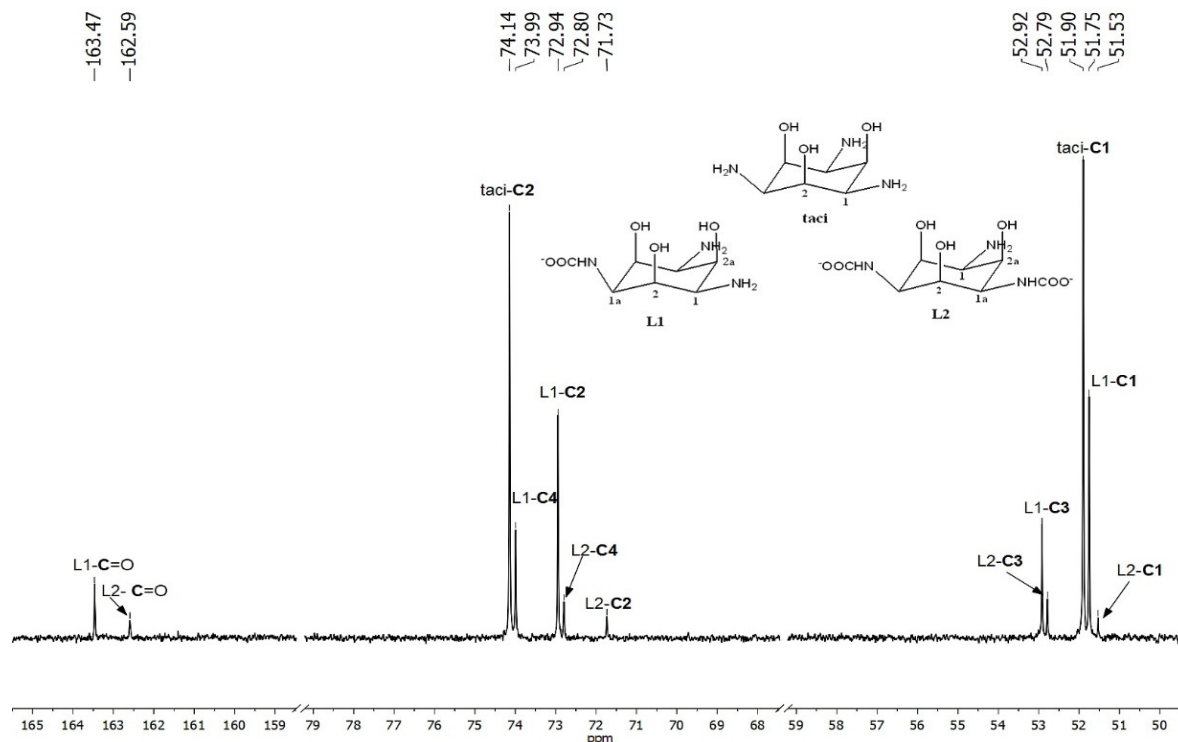

**Figure S8.**  $^{13}\text{C}$ -NMR spectrum of taci.2H<sub>2</sub>O in D<sub>2</sub>O, pD=8.4.

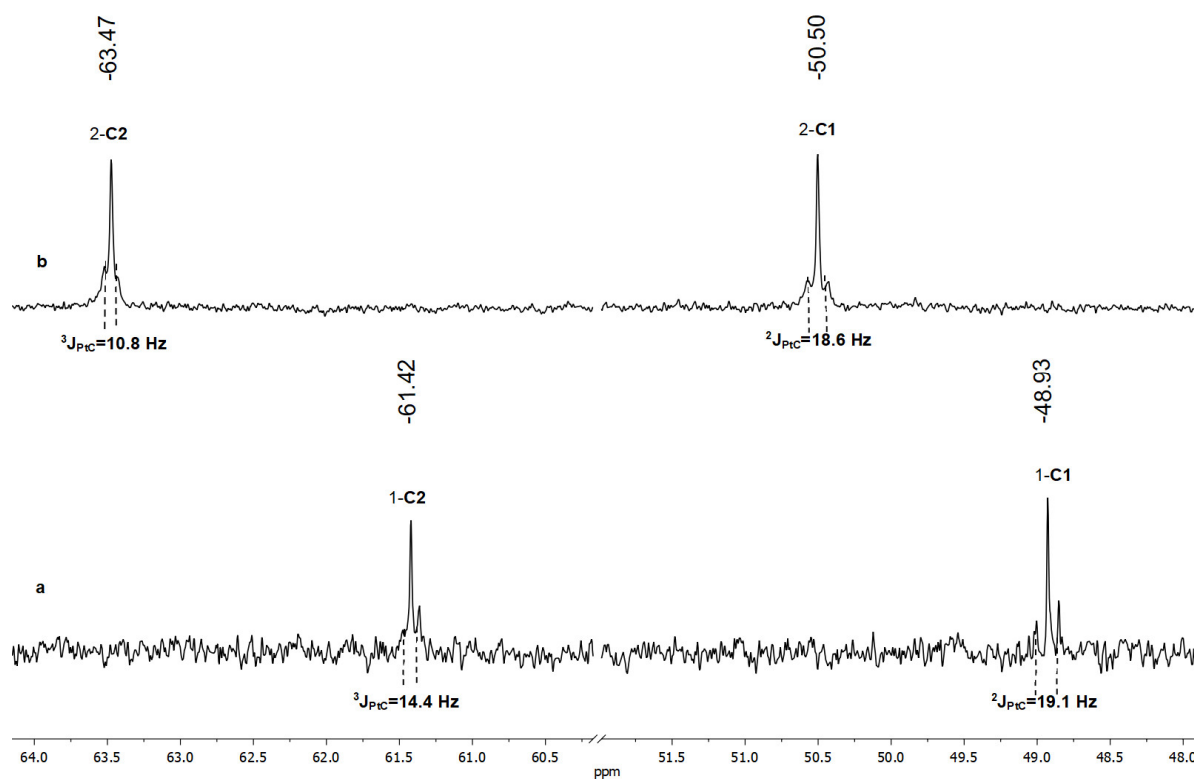

**Figure S9.**  $^{13}\text{C}$ -NMR spectrum of **1** (a) and **2** (b) in D<sub>2</sub>O.
